# 1 **Convergent recruitment of *Amh* as the sex determination** 2 **gene in two lineages of stickleback fish**

3  
4 **Authors:** Daniel L. Jeffries<sup>1</sup>, Jon Mee<sup>2</sup>, Catherine L. Peichel<sup>1</sup>

- 5  
6 1. Division of Evolutionary Ecology, Institute for Ecology and Evolution, University of  
7 Bern, 3012 Bern, Switzerland  
8 2. Department of Biology, Mount Royal University, Calgary, Canada  
9

10  
11 **Keywords:** Sex chromosome, turnover, teleosts, gene duplication  
12  
13

## 14 **Abstract**

15  
16 Sex chromosomes vary greatly in their age and levels of differentiation across the tree of life.  
17 This variation is largely due to the rates of sex chromosome turnover in different lineages;  
18 however, we still lack an explanation for why sex chromosomes are so conserved in some  
19 lineages (e.g. Mammals, Birds) but so labile in others (e.g. Fish, Amphibians). Here we add  
20 to the information on sex chromosomes in stickleback, a valuable model lineage for the study  
21 of sex chromosome evolution, by identifying the sex chromosome and a strong candidate for  
22 the master sex determination gene in the brook stickleback, *Culaea inconstans*. Using whole  
23 genome sequencing of wild-caught samples and a lab cross, we identify *AmhY*, a male  
24 specific duplication of the gene *Amh*, as the candidate master sex determination gene. *AmhY*  
25 resides on Chromosome 20 in *C. inconstans* and is likely a recent duplication, as both *AmhY*  
26 and the sex linked region of Chromosome 20 show little sequence divergence. Importantly,  
27 this duplicate *AmhY* represents the second independent duplication and recruitment of *Amh* as  
28 the sex determination gene in stickleback and the eighth example now known across teleosts.  
29 We discuss this convergence in the context of sex chromosome turnovers and the role that the  
30 *Amh/AmhrII* pathway, which is crucial for sex determination, may play in the evolution of  
31 sex chromosomes in teleosts.  
32  
33  
34

## 35 Introduction

36

37 Upon acquiring a master sex determination gene (MSD), sex chromosomes are set on an  
38 evolutionary trajectory different to that of the rest of the genome. In many cases  
39 recombination is reduced or suppressed entirely in the vicinity of the MSD, which opens the  
40 door to the accumulation of deleterious mutations due to Hill-Robertson interference and  
41 Muller's ratchet. Given enough time this process can lead to loss of gene function on the sex  
42 chromosomes and eventually to heteromorphic sex chromosomes (Charlesworth *et al.*, 2005),  
43 typified by those of Mammals and Birds (Bachtrog *et al.*, 2014).

44

45 In some taxa, however, sex chromosomes escape this process via sex chromosome turnovers,  
46 the swapping of the chromosome used for sex determination. When this occurs, sex  
47 chromosome differentiation is reset (Vicoso, 2019) and, as such, lineages with labile sex  
48 determining systems often have homomorphic, undifferentiated sex chromosomes (Jeffries *et al.*,  
49 2018). Sex chromosome turnovers can, therefore, be seen as one of the most impactful  
50 processes in the evolution of sex chromosomes and indeed the genome. However, we still  
51 lack a good understanding of what drives turnovers. One theory is that the accumulation of  
52 deleterious mutations in a sex linked, non-recombining region should favour a transition to a  
53 new sex determination gene as a means of purging the genome of mutation load (Blaser *et al.*,  
54 2014). Alternatively, a transition to a new sex chromosome may be favoured if it harbours a  
55 sexually antagonistic gene which, when linked to a new MSD, provides a fitness increase to  
56 both sexes (van Doorn & Kirkpatrick, 2007, 2010). Finally, turnovers may occur simply via  
57 drift (Saunders *et al.*, 2018). Understanding the relative importance of these drivers, and other  
58 factors that may contribute to sex chromosome evolution and transitions is essential to  
59 explain the diversity and distribution of sex determining systems in nature. However, we still  
60 lack sufficient empirical evidence from lineages with young and labile sex determining  
61 systems with which to test the above theories.

62

63 Sticklebacks (Teleostei: Gasterosteidae) are one such lineage, possessing a diverse set of sex  
64 chromosome systems across their phylogeny (Ross *et al.*, 2009; Dixon *et al.*, 2018; Natri *et al.*,  
65 2019; Peichel *et al.*, 2020; Sardell *et al.*, 2021). Species of the *Gasterosteus* genus share a  
66 relatively well conserved XY sex determining system located on Chromosome 19, which  
67 harbours a strong candidate for sex determination in *Gasterosteus*, *AmhY*, a Y-specific  
68 duplicate of the ancestrally autosomal gene *Amh*. This sex chromosome is estimated to have  
69 evolved approximately 22 million years ago (Peichel *et al.*, 2020) and is heteromorphic (Ross  
70 & Peichel, 2008), with considerable loss of genes on the Y (Peichel *et al.*, 2020; Sardell *et al.*,  
71 2021). However, in two *Gasterosteus* species, *G. nipponicus* and *G. wheatlandi*,  
72 independent Y-autosome fusion events have created neo sex chromosomes which became sex  
73 linked within the past two million years (Kitano *et al.*, 2009; Ross *et al.*, 2009). In the genus  
74 *Pungitius*, chromosome 19 is not known to be involved in sex determination, instead, Chr 12  
75 determines sex in *P. pungitius* (Ross *et al.*, 2009; Shapiro *et al.*, 2009; Rastas *et al.*, 2015;  
76 Natri *et al.*, 2019). However, despite interrogation of high quality genomic datasets for both  
77 *P. sinensis* and *P. tymensis*, no sex chromosome has yet been identified for these species  
78 (Dixon *et al.*, 2018). Similarly, no sex chromosome could be identified in either *Apeltes*

79 *quadracus* or *Culaea inconstans* using either cytogenetic techniques or genetic mapping with  
80 a small number of markers (Ross *et al.*, 2009). This suggests that the sex chromosomes of  
81 these species have little divergence between gametologs, making it likely that recent  
82 turnovers have occurred in at least some of these species. The sex chromosomes of  
83 stickleback therefore include old strata that have undergone degeneration, newly-formed and  
84 weakly differentiated strata on neo-sex chromosomes, and likely several new and  
85 undifferentiated sex chromosomes created by recent turnovers. As such, stickleback represent  
86 an invaluable system to test several facets of sex chromosome evolution theory.

87  
88 Here, we add to the information of sex chromosome systems in sticklebacks by identifying  
89 the sex chromosome and a strong candidate for the sex determination gene in the brook  
90 stickleback, *Culea inconstans*. We show that *C. inconstans* has undergone a sex chromosome  
91 turnover to a chromosome not previously known to be used in stickleback. This turnover  
92 seems to have been driven by a duplication and translocation of the well known sex  
93 determination gene, *Amh*, which is independent of the duplication of this gene in the  
94 *Gasterosteus* lineage. Thus, although the turnover involves a novel chromosome pair, the sex  
95 determination gene itself represents an example of convergence both in terms of function and  
96 the mode of turnover, and may provide clues as to why sex chromosomes in some lineages  
97 are so dynamic.

98

## 99 **Methods**

100

### 101 *Sample collection and sequencing*

102

103 In this study we examined two sample sets of the brook stickleback, *C. inconstans*. The first  
104 and largest is comprised of wild-caught individuals from a single population in Shunda Lake,  
105 Alberta, Canada (UTF-8 encoded WGS84 coordinates: 52.453899 latitude, -116.146192  
106 longitude). We collected a total of 84 samples in June of 2017 and 2019 using unbaited  
107 minnow traps (5 mm mesh). Samples were collected under a fisheries research license issued  
108 by the Government of Alberta. Collection methods and the use of animals in research was  
109 approved by the Animal Care Committee at Mount Royal University (Animal Care Protocol  
110 ID 101029 and 101795). We identified 46 males and 38 females at the site of capture by  
111 examining gonads, observing the extrusion of eggs, and by noting the presence of nuptial  
112 colouration in males. DNA was extracted using Qiagen DNEasy Blood and Tissue kits. DNA  
113 samples were sent to Genome Québec for shotgun DNA library preparation using an NEB  
114 Ultra II kit. Paired-end sequencing (150bp) was performed alongside other libraries; the  
115 samples in this study therefore received approximately one lane of Illumina HiSeqX (40  
116 samples collected in 2017) and half of a NovaSeq6000 lane with an S4 flow cell (remaining  
117 44 samples collected in 2019).

118

119 The second sample set consists of a single F1 lab cross between a female from Fox Holes  
120 Lake, Northwest Territories, Canada and a male from Pine Lake, Alberta, Canada; this cross  
121 was previously genotyped with a limited set of microsatellite markers (Ross *et al.*, 2009).

122 DNA was isolated from fin tissue using phenol-chloroform extraction followed by ethanol  
123 precipitation. Four Nextera sequencing libraries were prepared: one using DNA from the  
124 mother, one using DNA from the father, one using DNA pooled from 16 daughters, and one  
125 using DNA pooled from 14 sons. Paired-end sequencing was performed on an Illumina  
126 NovaSeq SP flow cell for 300 cycles at the University of Bern Next Generation Sequencing  
127 Platform.

128

### 129 ***Data pre-processing and SNP calling in wild-caught *C. inconstans****

130

131 Sequencing of the 84 Shunda lake stickleback yielded an average of 24.8 million read pairs  
132 per sample. Sequence quality was checked using FastQC and an average of 0.59% ( $\pm$  0.13%)  
133 read pairs per sample were dropped during adapter and quality trimming using Trimmomatic  
134 v.0.36 (Bolger *et al.*, 2014). Trimmed reads were then aligned using BWA-mem v.0.7.17 (Li  
135 & Durbin, 2009) with default alignment parameters to a genome assembly of a *P. pungitius*  
136 male (Varadharajan *et al.*, 2019) as it is the most closely related reference genome to *C.*  
137 *inconstans* (21.16 - 24.30 MYA) (Rabosky *et al.*, 2013, 2018; Betancur-R *et al.*, 2015;  
138 Sanciango *et al.*, 2016; Guo *et al.*, 2019). Alignment files were then processed with  
139 samtools v.1.10 and an average of 16.4% ( $\pm$  7.0%) read pairs were then marked as PCR  
140 duplicates and removed using picard-tools v.2.21.8. Remaining aligned reads resulted in an  
141 average read depth of 7.20 ( $\pm$  2.14) for each sample; however, coverage was highly variable  
142 along the genome, with peaks of coverage of over 1,500 reads in places, almost certainly  
143 driven by repeats.

144

145 Variant calling was performed using the Genome Analysis Toolkit (GATK) v.4.1.3.0  
146 following the GATK best practices pipeline (DePristo *et al.*, 2011) and resulted in 36,237,609  
147 variants before filtering. Comparison of these variants to Hardy-Weinberg expectations  
148 revealed a large number of variants with an excess of heterozygosity, likely as a result of  
149 repetitive regions. The full variant call sets for the wild-caught samples were then filtered  
150 using VCFtools v0.1.15 (Danecek *et al.*, 2011) to retain single nucleotide polymorphisms  
151 (SNPs) with the following attributes: within samples or pools, genotypes were retained if they  
152 had a minimum depth of 10 reads (--minDP 10) and a minimum genotype quality score of 30  
153 (--minGQ 30). Across samples, loci were kept if they had a maximum mean depth across all  
154 samples of 200 or lower (max-meanDP 200), less than 30% missing samples after genotype  
155 filters (--max-missing 0.3), and a minor allele frequency greater than 0.01 (--maf 0.01). These  
156 filtering criteria reduced the call set to 249,485 variants, which were used for all analyses of  
157 the wild-caught dataset below. However many loci showing excess heterozygosity persisted  
158 in the dataset, and were not filtered further, as this would likely remove signals of sex linkage  
159 (Fig. S1).

160

### 161 ***Identification of sex-linked regions of the genome in wild-caught *C. inconstans****

162

163 Sex-linked genome regions typically exhibit two features which can be used to identify them  
164 using genomic data analysis. The first is that they often lose or gain segments of DNA on  
165 only one of the sex chromosomes. Such regions produce a read depth difference among the

166 sexes in sequencing data reflecting their copy number in the genome. For instance, an X-  
167 specific region will have roughly 2n coverage in XX females, and only 1n coverage in XY  
168 males, resulting in a ratio of male:female read depth of around 1:2. Secondly, sex-linked  
169 regions accumulate sequence differences between the sex chromosomes. This often results in  
170 variants which are specific to the sex-limited chromosome, which leads to an increase in SNP  
171 density and heterozygosity in sex-linked regions in the heterogametic sex, relative to the  
172 homogametic sex. It is generally observed that small mutational differences accumulate on  
173 sex chromosomes in the early stages of their differentiation, and large loss or gain of DNA  
174 sequence is typically a sign of an older sex linked region. Here, we used both read depth and  
175 heterozygosity based approaches for assessing sex linkage across the genome in the wild-  
176 caught dataset from Shunda Lake.

177  
178 For the read depth analysis, Deeptools v.2.5.4 was used to calculate coverage per sample  
179 across the genome in 1kb windows, normalised by the average number of reads per kilobase  
180 mapped (RPKM) (script 11, appendix 1). Normalised coverages for each window were then  
181 averaged for each sex and the mean male depth per window was then divided by that of  
182 females and plots were smoothed using a rolling average over 10 windows (see Jupyter  
183 notebook JN\_02, appendix 1).

184  
185 We then assessed genotypes for patterns of heterozygosity consistent for sex linkage. SNP  
186 calling resulted in a large number of loci with excess heterozygosity, most likely due to reads  
187 from multiple repeat copies in *C. inconstans* aligning to a single (likely collapsed) repeat  
188 locus in the *P. pungitius* assembly (See above). However, repeats are common in sex-linked  
189 genomic regions and therefore likely to contain signals of sex linkage, some of which can be  
190 salvaged (i.e. old repeat copies which are unique enough for robust assembly and alignment).  
191 Thus, we opted not to mask repeats in the *P. pungitius* genome prior to read alignment.  
192 Instead, we used a novel test for the association of heterozygosity at each locus with sex. For  
193 each locus, we calculated the probability of the observed pattern of heterozygotes across  
194 males and females occurring by chance using a non-sequential random draw without  
195 replacement which takes into consideration the number of samples of each sex called at a  
196 given locus:

197

$$198 \quad p = \frac{\frac{N^M}{H^M} \times \frac{N^F}{H^F}}{\frac{N}{\bar{H}}}$$

199

200 Where N is the total number of samples called, N<sup>M</sup> is the number of males called, N<sup>F</sup> is the  
201 number of females called, H is the total number of heterozygotes, H<sup>M</sup> is the number of male  
202 heterozygotes and H<sup>F</sup> is the number of female heterozygotes. The resulting p-values suffer  
203 from multiple testing. However, much like in genome wide association studies, the correction  
204 is not straightforward as genetic linkage between loci in close proximity to each other  
205 violates the multiple testing assumption that each test is independent. Here we avoided this

206 issue by not invoking any threshold for “significant” sex linkage. Instead we simply use our  
207 calculated p-values as a relative measure of the extent of sex linkage. For reference, absolute  
208 sex linkage of a locus (i.e. heterozygous in all 46 males and homozygous in all 38 females)  
209 would yield  $p = 8.6 \times 10^{-25}$  ( $\log_2(p) = -79.9$ ), while, for a scenario with 20 heterozygotes  
210 evenly distributed across the sexes (11 male heterozygotes and 9 female),  $p = 0.2$  ( $\log_2(p) =$   
211  $-2.3$ ) (JN\_03, Appendix 1).

212

### 213 *Locating AmhY in the C. inconstans genome*

214

215 Male coverage patterns suggested that there is an additional sex-linked copy of *Amh* in the *C.*  
216 *inconstans* genome, implying that the duplicate must exist only on the Y chromosome (see  
217 Results). If a Y-specific copy of *Amh* exists, then, as an artifact of the read alignment to a  
218 genome with only a single copy of *Amh*, any mutations that have arisen in the Y copy since  
219 the duplication will be observed as male-specific SNPs within the Chromosome 08 copy of  
220 the gene. However, the Y-linked alleles at these sites should show half the coverage (1n) of  
221 the autosomal alleles (2n). Thus, to test the hypothesis of a Y-linked duplication of *Amh*, we  
222 compared allelic read depth ratios at the sex-linked SNPs located in the *Amy* gene and  
223 compared them to the rest of the SNPs throughout the genome in the wild-caught dataset,  
224 using a slightly modified implementation of HDplot (McKinney *et al.*, 2017) (JN\_04,  
225 Appendix 1).

226

227 We then asked: where in the genome does the sex-linked duplicate of *Amh* (and thus the Y  
228 chromosome) reside? Patterns of sex-biased heterozygosity identified two regions of the *P.*  
229 *pungitius* reference genome with signs of sex linkage: *Amh* on Chromosome 08 and  
230 Chromosome 20 (see Results). However it is not possible to have two strongly sex linked  
231 regions in a genome. Polygenic sex determination systems exist, but complete sex linkage  
232 signal would not be observed at either locus, which rules out this possibility in the current  
233 study. We therefore hypothesised that the two regions showing sex linkage are an artifact of  
234 the alignment to the *P. pungitius* genome assembly, and that, in *C. inconstans*, these sex-  
235 linked loci lie in a single region. The most parsimonious scenario is that the duplicated *Amh*  
236 copy resides in the region of Chromosome 20 showing sex linkage. However, there were also  
237 regions that showed signs of Y-specific duplications in this region of Chromosome 20 (see  
238 Results), raising the possibility that this region might also have duplicated, and that the sex  
239 determining region in *C. inconstans* may lie on a different chromosome altogether.

240

241 To test these competing theories, we first called structural variants in every wild-caught  
242 sample using DELLY v0.7.8 (Rausch *et al.*, 2012) and screened these variants for any  
243 translocations between the regions of sex linkage on Chromosomes 08 and 20, and for any  
244 variants showing patterns of sex linkage. Second, we used Abyss v2.0.2 (with default  
245 parameters) to produce a *de novo* contig assembly of a pool of raw reads from the three  
246 highest coverage *C. inconstans* males, equating to approximately 100x coverage of the  
247 genome. The aim of this approach was to produce contigs that included either the autosomal  
248 Chromosome 08 copy of *Amh*, or the sex-linked *AmhY* flanked by regions syntenic to the sex  
249 linked region of Chromosome 20.

250

251 Lastly, we analysed the whole genome resequencing of the lab cross consisting of  
252 individually sequenced parents, a female offspring pool, and a male offspring pool. As this  
253 cross represents only 30 separate meioses (i.e. 30 offspring) in the father, there should only  
254 have been on the order of 30 crossover events between the X and the Y chromosome. This  
255 design should thus result in large linkage blocks along the genome, making it much easier to  
256 identify regions of the genome which are inherited in a sex-linked fashion.

257

258 These sequence data were processed using the same procedures as for the wild-caught data:  
259 data were quality checked and trimmed using fastQC and trimmomatic, resulting in 177.6  
260 million retained reads for the father, 168 million for the mother, 160.8 million for the male  
261 offspring pool, and 75.7 million for the female offspring pool. These reads were aligned to  
262 the *P. pungitius* reference assembly, and duplicates were marked using picard-tools v.2.21.8.  
263 We called variants in the parents using bcftools v1.10, which resulted in 19.7 million  
264 unfiltered variants in the male and 19.4 million in the female. To call variants in the pooled  
265 sequencing data, we used samtools v.1.10 to create an mpileup file which was then converted  
266 to allele frequencies using MAPGD v0.4.40 (Lynch *et al.*, 2014). Variants were retained  
267 (using a custom python script JN\_05, Appendix 1) only if they were present in the father,  
268 mother, male pool and female pool, and if read depth in the parents was greater than 10 and  
269 parental genotype quality was greater than 30. To visualise the data, we plotted female - male  
270 allele frequencies along the genome. Sex-linked regions in which females are homozygous  
271 and males are heterozygous should show a female - male frequency of close to 0.5, compared  
272 to the autosomal expectation of close to 0. We then identified putatively sex-linked variants  
273 that were heterozygous in the father, homozygous in the mother and where the X-specific  
274 allele has a frequency between 0.4 - 0.8 in the male sequencing pool, and >0.98 in the female  
275 pool. These thresholds were chosen based on plotting male vs female pool frequencies (see  
276 Fig. S2 and JN\_05, Appendix 1).

277

### 278 ***Identifying the origin of AmhY in C. inconstans***

279

280 To identify the origin of *Amh* duplication in brook stickleback, we compared the *C.*  
281 *inconstans* copies of this gene to each other and to its orthologs from other stickleback  
282 species. It was first necessary to identify *Amh* sequences for available closely related species.  
283 To do this we capitalised on already published whole genome sequencing datasets for 7 other  
284 stickleback species (*G. aculeatus*: 4 males, 4 females (White *et al.*, 2015), *G. nipponicus*: 5  
285 males, 5 females (Yoshida *et al.*, 2014), *G. wheatlandi*: 4 males and 4 females (Liu *et al.*,  
286 2021), *P. pungitius*: 15 males, 15 females (Dixon *et al.*, 2018), *P. tymensis*: 15 males, 11  
287 females (Dixon *et al.*, 2018), *P. sinensis*: 13 males, 9 females (Dixon *et al.*, 2018) and *Apeltes*  
288 *quadracus*: 4 males, 4 females (Liu *et al.*, 2021)).

289

290 We aligned adapter and quality trimmed reads from each species to the latest *G. aculeatus*  
291 genome assembly, which includes the Y chromosome (Peichel *et al.*, 2020). We chose this  
292 reference over the *P. pungius* assembly as it is already known that an *Amh* duplicate exists on  
293 the assembled Y chromosome of *G. aculeatus* (Peichel *et al.*, 2020). Before aligning raw

294 reads, we removed the Y chromosome scaffold from this assembly to ensure that reads from  
295 any and all copies of *Amh* in each species would align to the ancestral *Amh* copy on  
296 Chromosome 08 in the *G. aculeatus* assembly.

297

298 Alignments were again performed using BWA-mem v0.7.17. Reads aligning to *Amh* on *G.*  
299 *aculeatus* Chromosome 08 were subsetted and bcftools v1.10 was used to call variants.  
300 Variants were filtered using VCFtools to ensure that each genotype was based on a minimum  
301 read depth of 5, had a minimum genotype quality score of 30 and that data for each locus was  
302 present in at least 70% of samples within a species dataset. The bcftools consensus tool was  
303 then used to produce a consensus sequence for each species using the major (highest  
304 frequency) allele at any polymorphic positions. Finally, in species where a sex-linked copy of  
305 *Amh* exists, the consensus for the Y copy of *Amh* was output using a custom python script to  
306 phase SNPs based on their sex linkage (JN\_06, Appendix 1). The resulting consensus  
307 sequences of *Amh* and *AmhY* were then aligned using the ClustalW algorithm implemented in  
308 MEGA v10.1 (Kumar *et al.*, 2018), and a maximum likelihood tree was constructed using a  
309 Tamura-Nei nucleotide substitution model with 500 bootstrap replicates, again implemented  
310 in MEGA.

311

312 Lastly, we predicted the effect of mutations between *Amh* paralogs in *Gasterosteus* and *C.*  
313 *inconstans* using Provean v1.1 (Choi, 2012; Choi *et al.*, 2012; Choi & Chan, 2015).

314 Provean compares a query protein to dozens of sequences from  
315 other taxa (in this case 66) taken from the NCBI protein database  
316 and computes a score which quantifies the conservation of each  
317 amino acid. As highly conserved amino acids are expected to be of  
318 high functional importance, this “Provean score” can be used to  
319 classify amino acid changes between two sequences of interest as  
320 putatively neutral (Provean score  $> -2.5$ ) or putatively  
321 deleterious (Provean score  $\leq -2.5$ ). We compared *Amh08* and *AmhY* in *C.*  
322 *inconstans* and, for reference, we also compared the ancestral *Amh08* and *AmhY* sequences  
323 for all *Gasterosteus* species which were reconstructed using GRASP-suite v2020.05.05.

324

## 325 **Results**

326

### 327 *Identification of sex-linked regions in C. inconstans*

328

329 Comparison of sequencing read depth between males and females failed to identify any large  
330 region of the genome with a reduction of read depth in one sex that would be indicative of  
331 well-differentiated sex chromosomes. This analysis did, however, identify several extremely  
332 narrow regions throughout the genome with either male or female coverage bias (Fig. 1).

333 Two such regions were of particular interest. Firstly, on Chromosome 08 there is a clear peak  
334 of high male vs female coverage centered at position 16.8-16.9Mb, which exactly matches  
335 the position of the gene *Amh* (Fig. S3). Secondly, three peaks of high male vs female



336 coverage co-localise within a ~5Mb region on Chromosome 20, between position 2-6Mb  
337 (Fig. 2). Such peaks of male biased coverage are suggestive of male-specific (i.e. Y  
338 chromosome-specific) duplications of these loci.

339

340 The test for the association of heterozygosity patterns with sex was effective at identifying  
341 regions of sex linkage and overcoming the excess heterozygosity in the dataset. The vast  
342 majority of loci showed high p-values indicative of no sex linkage (Fig. S4). Patterns of sex  
343 linkage were localised to two specific regions of the genome (Fig. 1). Of the 10 loci that  
344 showed complete sex linkage (i.e. homozygous in all females and heterozygous in all, or all  
345 but a few, males), nine of them aligned to a narrow region on Chromosome 08. This region  
346 exactly coincides with a peak of male vs. female read depth mentioned above at the location  
347 of *Amh* (Fig. S3). The vast majority of the remaining loci showing signs of sex linkage  
348 (including one completely sex linked locus) aligned to a ~0.6Mb region on Chromosome 20  
349 (5.3-5.9Mb), again coinciding with two peaks of increased male vs. female read depth (Fig.  
350 2).

351

352 Together, the higher male coverage and the male-biased heterozygosity suggest that a male  
353 specific (i.e. Y-specific) *Amh* copy exists in the *C. inconstans* genome (henceforth referred to  
354 as *AmhY*) in addition to the ancestral Chromosome 08 copy (henceforth *Amh08*). If this is  
355 true, then the coverage of the male specific alleles identified by our heterozygosity analysis,  
356 which must have arisen on *AmhY* since the duplication, should be close to  $\frac{1}{2}$  that of *Amh08*  
357 alleles. Read depth ratios for the nine completely sex linked SNPs showed a clear departure  
358 from a 1:1 ratio, and were close to the 1:2 expected ratio, supporting the hypothesis that a Y-  
359 specific *Amh* duplicate exists and harbours sex linked variation (Fig. S5). This is the only  
360 gene in the genome to show complete sex linkage and is thus a strong candidate for the  
361 master sex determination gene in *C. inconstans*.

362

363 ***Chromosome 20 is the candidate sex chromosome in C. inconstans.***

364

365 While *Amh08* was the only gene in the entire genome to show complete sex linkage, a ~0.6  
366 Mb region on Chromosome 20 also showed partial sex linkage in our heterozygosity analysis,  
367 suggesting that *AmhY* resides somewhere in or near to this region (Fig. 2). This raises the  
368 hypothesis that Chromosome 20 is the sex chromosome in *C. inconstans*. Additional support  
369 for this hypothesis comes from the fact that one of the 10 loci showing complete sex linkage  
370 aligned to this region of Chromosome 20 (specifically within an intron of the gene *Etfb*,  
371 which also shows male biased coverage indicative of a Y-specific duplication event).  
372 However, our structural variant analysis failed to identify any evidence of the theorised *Amh*  
373 duplication to this region, and further, there was not a single structural variant that showed  
374 the patterns of sex linkage expected for a Y-specific translocation (Fig. S6). Similarly, our *de*  
375 *novo* assembly of raw sequence reads from 10 males yielded only a single contig containing  
376 sequence homologous to *Amh* and this contig also contained regions homologous to the  
377 sequence flanking *Amh08*. Contigs aligning to the sex linked region of chromosome 20 were  
378 fragmented and showed no sign of containing *AmhY*. We were thus unable to show direct  
379 evidence of the theorised translocation event.

380

381 However, our analysis of the pooled sequencing data from a laboratory cross yielded 242  
382 putatively sex-linked markers, 158 of which aligned around the previously identified sex-  
383 linked region of Chromosome 20 (see red points in Fig. 2). In addition, there are many more  
384 markers (plotted in black) in this region with differences in female and male allele  
385 frequencies close to 0.5, as expected for sex-linked loci, but which were not heterozygous in  
386 the male sample. These are likely also sex linked, but lack heterozygous calls in the father  
387 due to allele dropout in low coverage regions. Importantly these results expanded the sex  
388 linked region of this chromosome from ~0.6Mb (from Shunda Lake data alone) to ~11Mb  
389 (between positions 1-12Mb).

390

### 391 *Convergent duplication and recruitment of Amh as the sex determination gene*

392

393 Consistent with the presence of only four SNPs between *Amh08* and *AmhY* in *C. inconstans*,  
394 the phylogenetic analyses of *Amh* sequences from all stickleback confidently clustered  
395 *Amh08* and *AmhY* from *C. inconstans* together (Fig. 3). Similarly the *Gasterosteus AmhY*  
396 sequences clustered together as an outgroup of the *Gasterosteus Amh08* sequences. These  
397 data, therefore, support an independent duplication of *Amh* in *C. inconstans*.

398

399 Proven analyses of amino acid conservation within *Amh* predicted that of the 93 inferred  
400 amino acid changes between the ancestral *Amh08* and *AmhY* sequences in *Gasterosteus*,  
401 seven of them are likely to cause deleterious functional changes (Table S1). In contrast, all  
402 three of the amino acid changes between *Amh08* and *AmhY* in *C. inconstans* were predicted to  
403 be neutral.

404

## 405 **Discussion**

406

407 The study of taxa with dynamic sex chromosome systems is key to understanding which  
408 forces and mechanisms shape the diversity of sex chromosomes and sex determination across  
409 the tree of life. In this study we have identified the sex chromosome in *C. inconstans*, a  
410 species for which there was previously no information. Thus, there are now five stickleback  
411 species with known sex chromosome systems, further solidifying this clade as a valuable  
412 model for the study of sex chromosome evolution. Importantly, several attributes of the *C.*  
413 *inconstans* sex chromosome system allow us to speculate on the evolutionary processes at  
414 work in this clade, which we discuss in detail below.

415

### 416 *A duplicate of Amh is the candidate master sex determination gene in C. inconstans*

417

418 Our genomic analyses in *C. inconstans* strongly suggest that the autosomal gene *Amh* has  
419 duplicated and that this duplicate has been recruited as the master sex determining gene in  
420 this species. However, we can not formally confirm this here. Formal functional validation of  
421 this candidate gene (e.g. using transgenics) is beyond the scope of this paper, and our  
422 attempts to find direct evidence of the location of *AmhY* on Chromosome 20 failed. However

423 this is perhaps not surprising. There are very few differences between *Amh08* and *AmhY*, thus  
424 our assembly approach likely had insufficient unique sequence variation between *Amh08* and  
425 *AmhY* to construct different contigs for each. Further, our structural variant analyses suffered  
426 from the short insert sizes (300-500 bp) of the sequencing performed here. Such analyses rely  
427 heavily on information from the discordant mapping of reads from the same read pairs, and  
428 the chances of reads aligning across a structural variant break point greatly decrease with  
429 smaller insert sizes.

430  
431 Nevertheless, the fact that *Amh* was the only gene in the genome to show absolute sex linkage  
432 in our population genetics analysis is very strong support for its role as the master sex  
433 determination gene. Furthermore, duplications of *Amh* have previously been implicated in sex  
434 determination in many fish species, including the pejerreys *Odontesthes hatcheri* and  
435 *Odontesthes bonariensis* (Hattori *et al.*, 2012; Yamamoto *et al.*, 2014), Nile tilapia  
436 *Oreochromis niloticus* (Eshel *et al.*, 2014; Li *et al.*, 2015), lingcod *Ophiodon elongatus*  
437 (Rondeau *et al.*, 2016), the cobaltcap silverside *Hypoatherina tsurugae* (Bej *et al.*, 2017),  
438 northern pike *Esox lucius* (Pan *et al.*, 2019), Sebastes rockfish *Sebastes schlegelii* (Song *et al.*,  
439 2021) and the *Gasterosteus* clade of stickleback (Peichel *et al.*, 2020; Sardell *et al.*,  
440 2021). *Amh* is also likely used for sex determination in Monotremes, though in this case, both  
441 X and Y *Amh* homologs exist and no duplication is apparent. Thus, *Amh* is clearly  
442 predisposed to becoming a master sex determination gene in teleosts, as exemplified in the  
443 results of the present study by its independent recruitment in two stickleback lineages within  
444 the last 25-30 My.

445  
446 It is interesting to note that, with the exception of monotremes, it is always a duplicate of  
447 *Amh* that determines sex, with no examples, to our knowledge, of the autosomal copy being  
448 recruited for sex determination in teleosts. This suggests that duplication is an important  
449 process in the recruitment of this gene as the master sex determination gene and begs the  
450 question as to why that may be. One hypothesis is that the ancestral, autosomal copies of *Amh*  
451 in these species play some vital role that cannot be altered but can be circumvented via its  
452 duplication and subsequent sub- or neo-functionalization. A second hypothesis is that the  
453 duplication itself is the sex determining mutation, i.e. simply increasing the dose of this gene  
454 is enough to initiate male development. We propose that the second of these hypotheses is  
455 more likely, based on two lines of reasoning. The first relies on the observation that, in all of  
456 the cases above (which are all XX/XY systems), the duplication is Y-specific and is absent  
457 from the X. If the duplicate does not determine sex when it first arises, then it is free to  
458 segregate like any autosomal gene on both homologs of its resident chromosome pair and, at  
459 least in some cases, it might be fixed. If one allele of the duplicate later acquires the male  
460 determination role, an X copy would still exist. Thus, to match the observation that no X  
461 homolog exists in any of the eight species discussed here, we would need to invoke multiple  
462 losses of the X homologs, which is unlikely. Alternatively, if, from the moment it arose, the  
463 duplicate could determine sex, homozygosity would not be possible, as that would require  
464 males mating with males. The lack of an X homolog is, therefore, an intrinsic prediction of a  
465 scenario where the duplicate *Amh* determines sex from the moment of duplication.

466

467 The second line of reasoning rests on our results suggesting that the three amino acid changes  
468 between *Amh08* and *AmhY* in *C. inconstans* do not substantially alter the function of the  
469 protein. This would imply that no functional change was necessary for *AmhY* to assume the  
470 role of sex determination in *C. inconstans* and implicates the increased gene dose as the likely  
471 sex determination mechanism. In contrast to the *Amh* duplication in *C. inconstans*, the  
472 duplication events in northern pike, *Gasterosteus* stickleback, rockfish, pejerreys, lingcod, the  
473 cobaltcap silverside, and Nile tilapia, are relatively old. In all of these cases, there is  
474 substantial protein sequence divergence between the ancestral and duplicated *Amh* copies,  
475 however it is not possible to infer whether these mutations were important in the recruitment  
476 of the *Amh* duplicates for sex determination in these species, or whether they have arisen  
477 since. It would be interesting to follow up on this question in future studies, for example, by  
478 creating transgenic XX individuals with an additional *Amh* copy to test for the effect of  
479 increased *Amh* dose on sex determination, in the absence of any amino acid changes.

480  
481 Another interesting observation is that all eight of the species known to have independently  
482 recruited *Amh* duplicates for sex determination (including *C. inconstans* as shown here)  
483 belong to the clade Teleostei. This is unlikely to be purely coincidental. In most vertebrates,  
484 *Amh* (Anti-Müllerian hormone) is responsible for inhibiting the development of the female  
485 reproductive tract (Müllerian ducts) during embryogenesis (Capel, 2017) and thus promoting  
486 male development. However, teleosts lack Müllerian ducts (Adolfi *et al.*, 2019). The exact  
487 role of *Amh* in teleosts is not yet well understood, however gene expression data from Nile  
488 tilapia (Li *et al.*, 2015) and pejerreys (Hattori *et al.*, 2012; Yamamoto *et al.*, 2014) shows  
489 expression of the *Amh* duplicate genes occurs just prior to gonadal differentiation, suggesting  
490 that they likely play an important role in the proliferation and differentiation of germ cells  
491 during gonad development. Based on the above, one could speculate that the loss of  
492 Müllerian ducts in teleosts has freed *Amh* of its primary role of Müllerian duct suppression  
493 and this allows it to be more easily repurposed for sex determination.

494  
495 More broadly, while several theoretical studies have considered the evolutionary forces that  
496 might drive a new MSD to fixation, one understudied component of sex chromosome  
497 turnovers is the rate at which alternative MSDs arise. Given that the genetic architecture of  
498 sex determination pathways differ drastically among taxa (Capel, 2017), it is not  
499 unreasonable to expect that taxa also differ in the number of possible alternative MSDs that  
500 exist. Thus, it is possible that in some lineages, the rate of sex chromosome turnovers is  
501 limited by the constraints of their existing sex determination pathway and the frequency with  
502 which alternative MSDs can arise, while, in others, there may be numerous potential MSDs,  
503 which can readily evolve via simple mutations (e.g. gene duplication). The *Amh/AmhrII*  
504 pathway in teleosts may be an example of such a scenario, and may in turn help explain their  
505 rapid turnover rate. Indeed, *AmhrII*, the receptor of *Amh* has also been found to be the sex  
506 determiner in pufferfish (Kamiya *et al.*, 2012; Ieda *et al.*, 2018), the ayu *Plecoglossus*  
507 *altivelis* (Nakamoto *et al.*, 2021) and the yellow perch *Perca flavescens* (Feron *et al.*, 2020).

508  
509 ***Sex chromosome turnover in Stickleback***

510

511 With the results of this study, there are now three independently evolved sex chromosome  
512 systems known in sticklebacks, Chromosome 19 (*AmhY*) in *Gasterosteus* (with a further two  
513 independent Y-autosome fusion events within this clade), Chromosome 12 in *Pungitius*  
514 *pungitius* and now Chromosome 20 in *C. inconstans*. There must therefore be a minimum of  
515 two sex chromosome turnover events among these species. However, the inability to find sex  
516 linkage signal on any of these chromosomes in *P. tymensis* or *P. sinensis* (Dixon *et al.*, 2018)  
517 or in *A. quadracus* (Ross *et al.* 2009) might be suggestive of more turnovers.

518  
519 The sex chromosome of *C. inconstans* shows the lowest divergence of any of the sex  
520 chromosomes now described in stickleback when compared to the heteromorphism observed  
521 in *Gasterosteus* (Ross & Peichel, 2008; Peichel *et al.*, 2020; Sardell *et al.*, 2021) and the large  
522 region of differentiation found in *P. pungitius* (Dixon *et al.*, 2018). Consistent with a lack of  
523 extensive degeneration on the Y, there is no evidence of a reduction in read coverage in  
524 males relative to females. Furthermore, there are very few loci that show evidence of  
525 differentiation between the X and the Y (i.e. differences in heterozygosity between males and  
526 females). In fact, if we are correct in our hypothesis that *AmhY* lies near to the gene *Eftb* on  
527 Chromosome 20, then the completely sex-linked region of this chromosome may be on the  
528 order of 1Mb in length. Given that, in general, recombination loss and sex chromosome  
529 differentiation expands outwards from the sex determination locus over time, this would  
530 suggest that the turnover event in *C. inconstans* was very recent, and that the sex  
531 chromosomes in this species are young. Unfortunately, we cannot precisely estimate the size  
532 and level of differentiation of the sex-linked region without a good quality long read  
533 assembly of the X and Y chromosomes of *C. inconstans*. However, if it is recent, as our  
534 current data suggests, it may be possible to infer the identity of the ancestral sex chromosome  
535 pair by searching for signals left behind during its time in this role (e.g. reduced effective  
536 population size, increased repeat content (Vicoso & Bachtrog, 2013)). This would be an  
537 interesting topic of further study and could help to further characterise the transitions among  
538 sex chromosomes in stickleback.

539  
540 Interestingly, our coverage analyses also identified several other genes in this sex-linked  
541 region which seem to have have male specific copies (see inlays in Fig. 2). None of these  
542 genes have roles that have previously been associated with sex, though it is possible that their  
543 duplication and linkage with the sex determination gene may still be adaptive, for example, as  
544 a means of resolving genomic conflict at a sexually antagonistic locus (Bergero *et al.*, 2019).  
545 The gene locations in this study are based on those in the *P. pungitius* assembly, however,  
546 given that they show evidence of sex linkage, its is likely that these genes are in  
547 approximately the same location in *C. inconstans*. In addition, a manual examination of the  
548 *G. aculeatus* genome assembly places *tbx20* and *ANKMY2* next to *Mag* between positions 5 -  
549 6 Mb on Chromosome 20 (*CACNA11*, *CD22*, *Eftb*, and *Lim2* were unfortunately not  
550 annotated in *G. aculeatus*). These locations are, therefore, likely ancestral. However, given  
551 the proximity of *tbx20*, *ANKMY2*, and *Mag* in *G. aculeatus*, there may, in fact, be an  
552 inversion around 2 - 5 Mb specific to *P. pungitius*, which would explain the distance between  
553 the sex linked *tbx20* duplicate and the region of sex linkage identified in the wild-caught data  
554 and the dearth of sex-linked variants in the lab cross in this region. Thus, it seems this region

555 may be particularly prone to structural variation. Again, a high quality reference assembly for  
556 the *C. inconstans* X and Y chromosomes is needed to resolve the speculation above.

557

558 In the context of studying young sex chromosomes, it is useful to highlight the utility of  
559 different data types in our analyses. Though pooled sequencing strategies lose individual  
560 haplotype information and the ability to examine heterozygosities, the fact that this data came  
561 from an F1 cross limited the number of recombination events in the dataset. The resulting  
562 large blocks of linkage disequilibrium along the genome made this dataset ideal for looking  
563 for a broad signal of sex linkage and, in this case, was essential for confidently identifying the  
564 sex chromosome. In fact, given how broad the sex linkage signal is in this cross, individual  
565 based sequencing would have been overkill, as increasing marker density far beyond the size  
566 of linkage blocks would add no more biological information. It should be noted, however,  
567 that such an approach will always overestimate the extent of true recombination suppression  
568 between sex chromosomes because the detection of rare recombination events is limited by  
569 the number of individuals in the cross. In contrast, the population level dataset from Shunda  
570 Lake represents a large sampling and sequencing effort in terms of both money and time, but  
571 provided the extremely fine resolution needed to distinguish between the complete sex  
572 linkage of a single gene, infer its duplication, and to infer partial sex linkage elsewhere in the  
573 genome. Importantly, this resolution comes not only from the high marker density and  
574 numerous samples, but from the large number of recombination events that have happened in  
575 the ancestors of all individuals sampled. Incorporating long coalescent times into a sample set  
576 captures linkage information from thousands of recombination events, and it is this that  
577 allowed us to so finely map sex-linked regions of the genome in this study. We highlight this  
578 point with the hope of aiding future researchers to design the most informative and cost  
579 effective dataset for their purposes.

580

581

### 582 **Data availability**

583 The sequencing data in this study is in the process of being uploaded to the SRA, accessions  
584 will be included here before publication. All custom python scripts can be found in Jupyter  
585 notebooks in the appendix, along with relevant intermediate files from the evolutionary  
586 analyses.

587

588

589

## 590 References

- 591 Adolphi, M.C., Nakajima, R.T., Nóbrega, R.H. & Scharl, M. 2019. Intersex,  
592 hermaphroditism, and gonadal plasticity in vertebrates: evolution of the Müllerian Duct  
593 and Amh/Amhr2 signaling. *Annu Rev Anim Biosci* **7**: 149–172.
- 594 Bachtrog, D., Mank, J.E., Peichel, C.L., Kirkpatrick, M., Otto, S.P., Ashman, T.-L., *et*  
595 *al.* 2014. Sex determination: why so many ways of doing it? *PLoS Biol.* **12**: e1001899.
- 596 Bej, D.K., Miyoshi, K., Hattori, R.S., Strüssmann, C.A. & Yamamoto, Y. 2017. A  
597 duplicated, truncated amh gene Is involved in male sex determination in an old world  
598 silverside. *G3* **7**: 2489–2495.
- 599 Bergero, R., Gardner, J., Bader, B., Yong, L. & Charlesworth, D. 2019. Exaggerated  
600 heterochiasmy in a fish with sex-linked male coloration polymorphisms. *Proc. Natl.*  
601 *Acad. Sci. U. S. A.* **116**: 6924–6931.
- 602 Betancur-R, R., Ortí, G. & Pyron, R.A. 2015. Fossil-based comparative analyses reveal  
603 ancient marine ancestry erased by extinction in ray-finned fishes. *Ecol. Lett.* **18**: 441–  
604 450.
- 605 Blaser, O., Neuenschwander, S. & Perrin, N. 2014. Sex-chromosome turnovers: the hot-  
606 potato model. *Am. Nat.* **183**: 140–146.
- 607 Bolger, A.M., Lohse, M. & Usadel, B. 2014. Trimmomatic: a flexible trimmer for  
608 Illumina sequence data. *Bioinformatics* **30**: 2114–2120.
- 609 Capel, B. 2017. Vertebrate sex determination: evolutionary plasticity of a fundamental  
610 switch. *Nat. Rev. Genet.* **18**: 675–689.
- 611 Charlesworth, D., Charlesworth, B. & Marais, G. 2005. Steps in the evolution of  
612 heteromorphic sex chromosomes. *Heredity* **95**: 118–128.
- 613 Choi, Y. 2012. A fast computation of pairwise sequence alignment scores between a  
614 protein and a set of single-locus variants of another protein. In: *Proceedings of the ACM*  
615 *Conference on Bioinformatics, Computational Biology and Biomedicine*, pp. 414–417.  
616 Association for Computing Machinery, New York, NY, USA.
- 617 Choi, Y. & Chan, A.P. 2015. PROVEAN web server: a tool to predict the functional  
618 effect of amino acid substitutions and indels. *Bioinformatics* **31**: 2745–2747.
- 619 Choi, Y., Sims, G.E., Murphy, S., Miller, J.R. & Chan, A.P. 2012. Predicting the  
620 functional effect of amino acid substitutions and indels. *PLoS One* **7**: e46688.
- 621 Danecek, P., Auton, A., Abecasis, G., Albers, C.A., Banks, E., DePristo, M.A., *et al.*  
622 2011. The variant call format and VCFtools. *Bioinformatics* **27**: 2156–2158.
- 623 DePristo, M.A., Banks, E., Poplin, R., Garimella, K.V., Maguire, J.R., Hartl, C., *et al.*  
624 2011. A framework for variation discovery and genotyping using next-generation DNA  
625 sequencing data. *Nat. Genet.* **43**: 491–498.
- 626 Dixon, G., Kitano, J. & Kirkpatrick, M. 2018. The origin of a new sex chromosome by

- 627 introgression between two stickleback fishes. *Mol. Biol. Evol.* **36**: 28–38.
- 628 Eshel, O., Shirak, A., Dor, L., Band, M., Zak, T., Markovich-Gordon, M., *et al.* 2014.  
629 Identification of male-specific amh duplication, sexually differentially expressed genes  
630 and microRNAs at early embryonic development of Nile tilapia (*Oreochromis*  
631 *niloticus*). *BMC Genomics* **15**: 774.
- 632 Feron, R., Zahm, M., Cabau, C., Klopp, C., Roques, C., Bouchez, O., *et al.* 2020.  
633 Characterization of a Y-specific duplication/insertion of the anti-Müllerian hormone  
634 type II receptor gene based on a chromosome-scale genome assembly of yellow perch,  
635 *Perca flavescens*. *Mol. Ecol. Resour.* **20**: 531–543.
- 636 Guo, B., Fang, B., Shikano, T., Momigliano, P., Wang, C., Kravchenko, A., *et al.* 2019.  
637 A phylogenomic perspective on diversity, hybridization and evolutionary affinities in  
638 the stickleback genus *Pungitius*. *Mol. Ecol.* **28**: 4046–4064.
- 639 Hattori, R.S., Murai, Y., Oura, M., Masuda, S., Majhi, S.K., Sakamoto, T., *et al.* 2012. A  
640 Y-linked anti-Müllerian hormone duplication takes over a critical role in sex  
641 determination. *Proc. Natl. Acad. Sci. U. S. A.* **109**: 2955–2959.
- 642 Ieda, R., Hosoya, S., Tajima, S., Atsumi, K., Kamiya, T., Nozawa, A., *et al.* 2018.  
643 Identification of the sex-determining locus in grass puffer (*Takifugu niphobles*) provides  
644 evidence for sex-chromosome turnover in a subset of Takifugu species. *PLoS One* **13**:  
645 e0190635.
- 646 Jeffries, D.L., Lavanchy, G., Sermier, R., Sredl, M.J., Miura, I., Borzée, A., *et al.* 2018.  
647 A rapid rate of sex-chromosome turnover and non-random transitions in true frogs. *Nat.*  
648 *Commun.* **9**: 4088.
- 649 Kamiya, T., Kai, W., Tasumi, S., Oka, A., Matsunaga, T., Mizuno, N., *et al.* 2012. A  
650 trans-species missense SNP in *Amhr2* is associated with sex determination in the tiger  
651 pufferfish, *Takifugu rubripes* (fugu). *PLoS Genet.* **8**: e1002798.
- 652 Kitano, J., Ross, J.A., Mori, S., Kume, M., Jones, F.C., Chan, Y.F., *et al.* 2009. A role  
653 for a neo-sex chromosome in stickleback speciation. *Nature* **461**: 1079–1083.
- 654 Kumar, S., Stecher, G., Li, M., Knyaz, C. & Tamura, K. 2018. MEGA X: molecular  
655 evolutionary genetics analysis across computing platforms. *Mol. Biol. Evol.* **35**: 1547–  
656 1549.
- 657 Li, H. & Durbin, R. 2009. Fast and accurate short read alignment with Burrows-Wheeler  
658 transform. *Bioinformatics* **25**: 1754–1760.
- 659 Li, M., Sun, Y., Zhao, J., Shi, H., Zeng, S., Ye, K., *et al.* 2015. A tandem duplicate of  
660 anti-Müllerian hormone with a missense SNP on the Y chromosome is essential for male  
661 sex determination in Nile tilapia, *Oreochromis niloticus*. *PLoS Genet.* **11**: e1005678.
- 662 Liu, Z., Roesti, M., Marques, D., Hiltbrunner, M., Saladin, V. & Peichel, C.L. 2021.  
663 Chromosomal fusions facilitate adaptation to divergent environments in threespine  
664 stickleback. *Mol. Biol. Evol.*, doi: 10.1093/molbev/msab358.
- 665 Lynch, M., Bost, D., Wilson, S., Maruki, T. & Harrison, S. 2014. Population-genetic



- 666 inference from pooled-sequencing data. *Genome Biol. Evol.* **6**: 1210–1218.
- 667 McKinney, G.J., Waples, R.K., Seeb, L.W. & Seeb, J.E. 2017. Paralogs are revealed by  
668 proportion of heterozygotes and deviations in read ratios in genotyping-by-sequencing  
669 data from natural populations. *Mol. Ecol. Resour.* **17**: 656–669.
- 670 Nakamoto, M., Uchino, T., Koshimizu, E., Kuchiishi, Y., Sekiguchi, R., Wang, L., *et al.*  
671 2021. A Y-linked anti-Müllerian hormone type-II receptor is the sex-determining gene  
672 in ayu, *Plecoglossus altivelis*. *PLoS Genet.* **17**: e1009705.
- 673 Natri, H.M., Merilä, J. & Shikano, T. 2019. The evolution of sex determination  
674 associated with a chromosomal inversion. *Nat. Commun.* **10**: 145.
- 675 Pan, Q., Feron, R., Yano, A., Guyomard, R., Jouanno, E., Vigouroux, E., *et al.* 2019.  
676 Identification of the master sex determining gene in Northern pike (*Esox lucius*) reveals  
677 restricted sex chromosome differentiation. *PLoS Genet.* **15**: e1008013.
- 678 Peichel, C.L., McCann, S.R., Ross, J.A., Naftaly, A.F.S., Urton, J.R., Cech, J.N., *et al.*  
679 2020. Assembly of the threespine stickleback Y chromosome reveals convergent  
680 signatures of sex chromosome evolution. *Genome Biol.* **21**: 177.
- 681 Rabosky, D.L., Chang, J., Title, P.O., Cowman, P.F., Sallan, L., Friedman, M., *et al.*  
682 2018. An inverse latitudinal gradient in speciation rate for marine fishes. *Nature* **559**:  
683 392–395. [nature.com](https://www.nature.com).
- 684 Rabosky, D.L., Santini, F., Eastman, J., Smith, S.A., Sidlauskas, B., Chang, J., *et al.*  
685 2013. Rates of speciation and morphological evolution are correlated across the largest  
686 vertebrate radiation. *Nat. Commun.* **4**: 1958.
- 687 Rastas, P., Calboli, F.C.F., Guo, B., Shikano, T. & Merilä, J. 2015. Construction of  
688 ultradense linkage maps with Lep-MAP2: stickleback F2 recombinant crosses as an  
689 example. *Genome Biol. Evol.* **8**: 78–93.
- 690 Rausch, T., Zichner, T., Schlattl, A., Stütz, A.M., Benes, V. & Korbel, J.O. 2012.  
691 DELLY: structural variant discovery by integrated paired-end and split-read analysis.  
692 *Bioinformatics* **28**: i333–i339.
- 693 Rondeau, E.B., Laurie, C.V., Johnson, S.C. & Koop, B.F. 2016. A PCR assay detects a  
694 male-specific duplicated copy of Anti-Müllerian hormone (amh) in the lingcod  
695 (*Ophiodon elongatus*). *BMC Res. Notes* **9**: 230.
- 696 Ross, J.A. & Peichel, C.L. 2008. Molecular cytogenetic evidence of rearrangements on  
697 the Y chromosome of the threespine stickleback fish. *Genetics* **179**: 2173–2182.
- 698 Ross, J.A., Urton, J.R., Boland, J., Shapiro, M.D. & Peichel, C.L. 2009. Turnover of sex  
699 chromosomes in the stickleback fishes (Gasterosteidae). *PLoS Genet.* **5**: e1000391.
- 700 Sanciangco, M.D., Carpenter, K.E. & Betancur-R, R. 2016. Phylogenetic placement of  
701 enigmatic percomorph families (Teleostei: Percomorphaceae). *Mol. Phylogenet. Evol.*  
702 **94**: 565–576.
- 703 Sardell, J.M., Josephson, M.P., Dalziel, A.C., Peichel, C.L. & Kirkpatrick, M. 2021.

- 704 Heterogeneous Histories of Recombination Suppression on Stickleback Sex  
705 Chromosomes. *Mol. Biol. Evol.* **38**: 4403–4418.
- 706 Saunders, P.A., Neuenschwander, S. & Perrin, N. 2018. Sex chromosome turnovers and  
707 genetic drift: A simulation study. *J. Evol. Biol.* **31**: 1413–1419.
- 708 Shapiro, M.D., Summers, B.R., Balabhadra, S., Aldenhoven, J.T., Miller, A.L.,  
709 Cunningham, C.B., *et al.* 2009. The genetic architecture of skeletal convergence and sex  
710 determination in ninespine sticklebacks. *Curr. Biol.* **19**: 1140–1145.
- 711 Song, W., Xie, Y., Sun, M., Li, X., Fitzpatrick, C.K., Vaux, F., *et al.* 2021. A duplicated  
712 amh is the master sex-determining gene for *Sebastes* rockfish in the Northwest Pacific.  
713 *Open Biol.* **11**: 210063.
- 714 van Doorn, G.S. & Kirkpatrick, M. 2010. Transitions between male and female  
715 heterogamety caused by sex-antagonistic selection. *Genetics* **186**: 629–645.
- 716 van Doorn, G.S. & Kirkpatrick, M. 2007. Turnover of sex chromosomes induced by  
717 sexual conflict. *Nature* **449**: 909–912.
- 718 Varadharajan, S., Rastas, P., Löytynoja, A., Matschiner, M., Calboli, F.C.F., Guo, B., *et*  
719 *al.* 2019. A high-quality assembly of the nine-spined stickleback (*Pungitius pungitius*)  
720 genome. *Genome Biol. Evol.* **11**: 3291–3308.
- 721 Vicoso, B. 2019. Molecular and evolutionary dynamics of animal sex-chromosome  
722 turnover. *Nat Ecol Evol* **3**: 1632–1641.
- 723 Vicoso, B. & Bachtrog, D. 2013. Reversal of an ancient sex chromosome to an  
724 autosome in *Drosophila*. *Nature* **499**: 332–335. [nature.com](https://doi.org/10.1038/nature12544).
- 725 White, M.A., Kitano, J. & Peichel, C.L. 2015. Purifying selection maintains dosage-  
726 sensitive genes during degeneration of the threespine stickleback Y chromosome. *Mol.*  
727 *Biol. Evol.* **32**: 1981–1995.
- 728 Yamamoto, Y., Zhang, Y., Sarida, M., Hattori, R.S. & Strüssmann, C.A. 2014.  
729 Coexistence of genotypic and temperature-dependent sex determination in pejerrey  
730 *Odontesthes bonariensis*. *PLoS One* **9**: e102574.
- 731 Yoshida, K., Makino, T., Yamaguchi, K., Shigenobu, S., Hasebe, M., Kawata, M., *et al.*  
732 2014. Sex chromosome turnover contributes to genomic divergence between incipient  
733 stickleback species. *PLoS Genet.* **10**: e1004223.
- 734

735 **Figures**

736

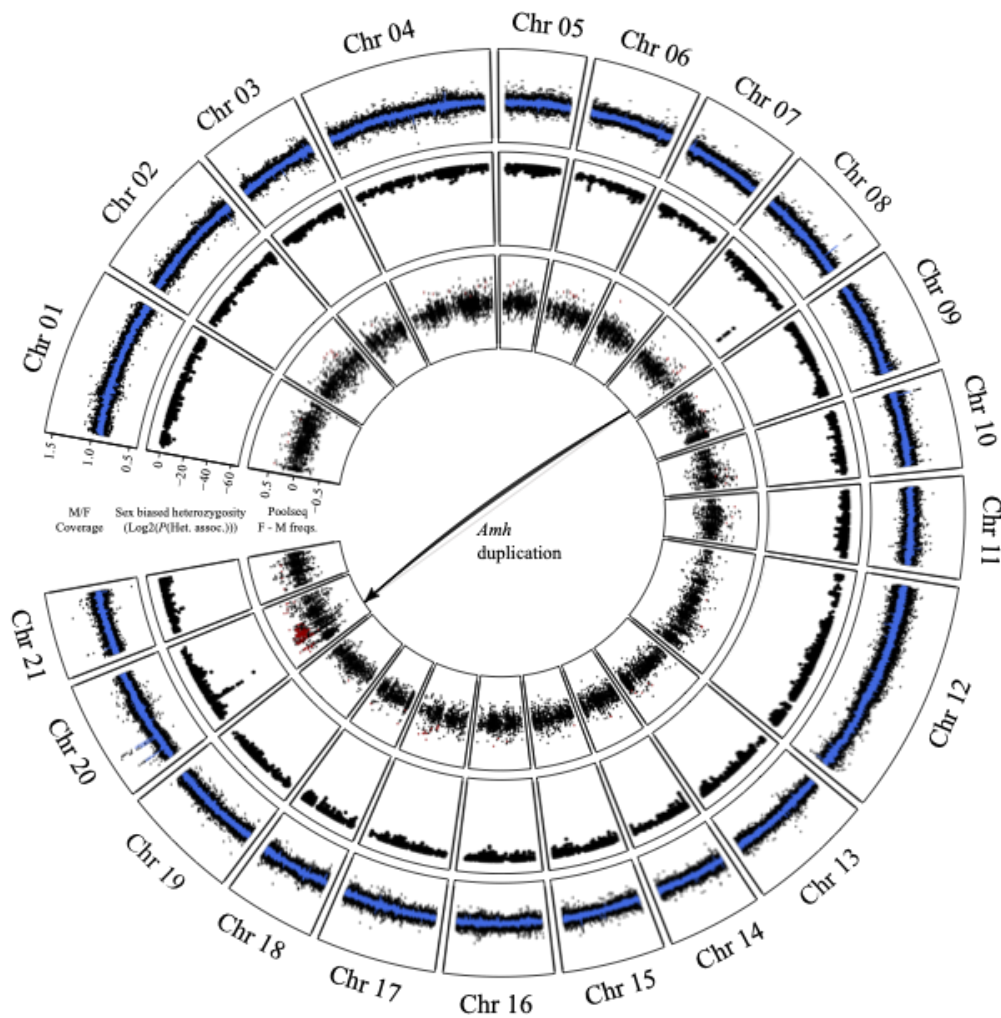

737

738 **Figure 1.** Sex linkage in *C. inconstans*, visualised on the *P. pungitius* genome assembly.

739 Outer track: male / female coverage in 1kb windows. The blue line represents the rolling

740 average across 10 windows. Middle track: results of the test for association of heterozygosity

741 patterns with sex. Inner track: female pool - male pool allele frequencies from the lab cross.

742 The red points represent loci with parental genotypes and pool frequencies that fit

743 expectations of sex linkage (see Methods).

744

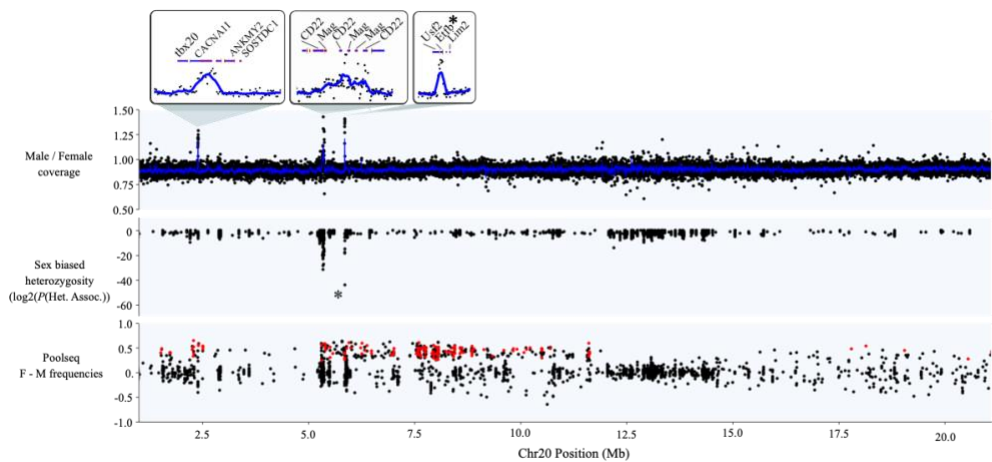

745  
746  
747  
748  
749  
750  
751  
752  
753

**Figure 2.** Signals of sex linkage along Chromosome 20, the putative sex chromosome in *C. inconstans*. For the coverage panel, each point represents male / female coverage in a 1kb window. The blue line represents the rolling average across 10 windows. The asterisk in the heterozygosity panel and the zoomed box above represents the single completely sex linked variant that aligned to Chromosome 20 (in the gene *Eftb*). For the pooled sequencing panel, red points represent those with parental genotypes and pool frequencies that fit expectations of sex linkage (see Methods).

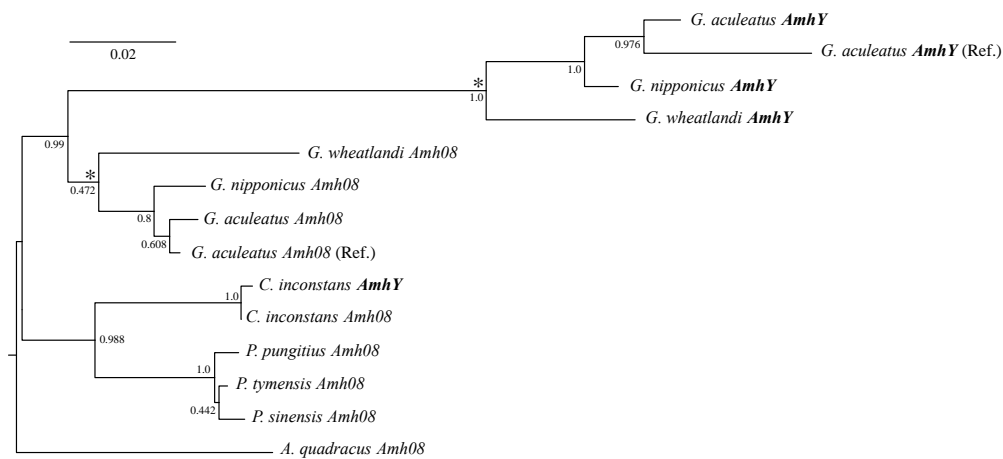

754  
755  
756  
757  
758  
759  
760  
761

**Figure 3.** Maximum likelihood phylogeny of *Amh* consensus sequences for eight stickleback species. Node values represent confidence based on 500 bootstraps. Also included are the phased reference *Amh* and *AmhY* sequences from the *G. aculeatus* genome assembly (Peichel *et al.*, 2020). Asterisks denote the nodes for which we reconstructed ancestral *Amh* and *AmhY* sequences for our mutation function predictions (see Methods).

762 **Supplementary figures**

763

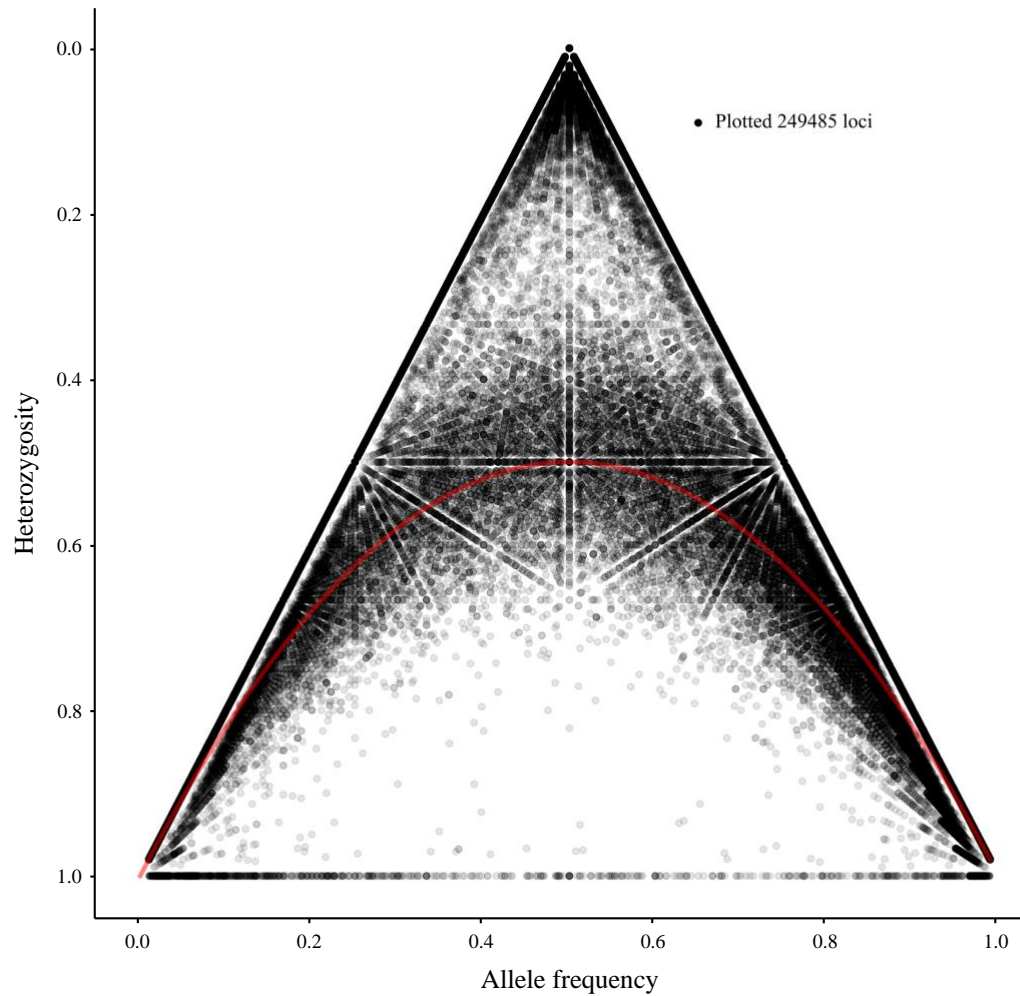

764

765 **Figure S1.** Comparison of allele frequency and heterozygosity to assess the quality of post-  
766 filtering genotype calls in the Shunda Lake whole genome resequencing dataset. The red line  
767 represents the expectation under Hardy-Weinberg equilibrium.

768

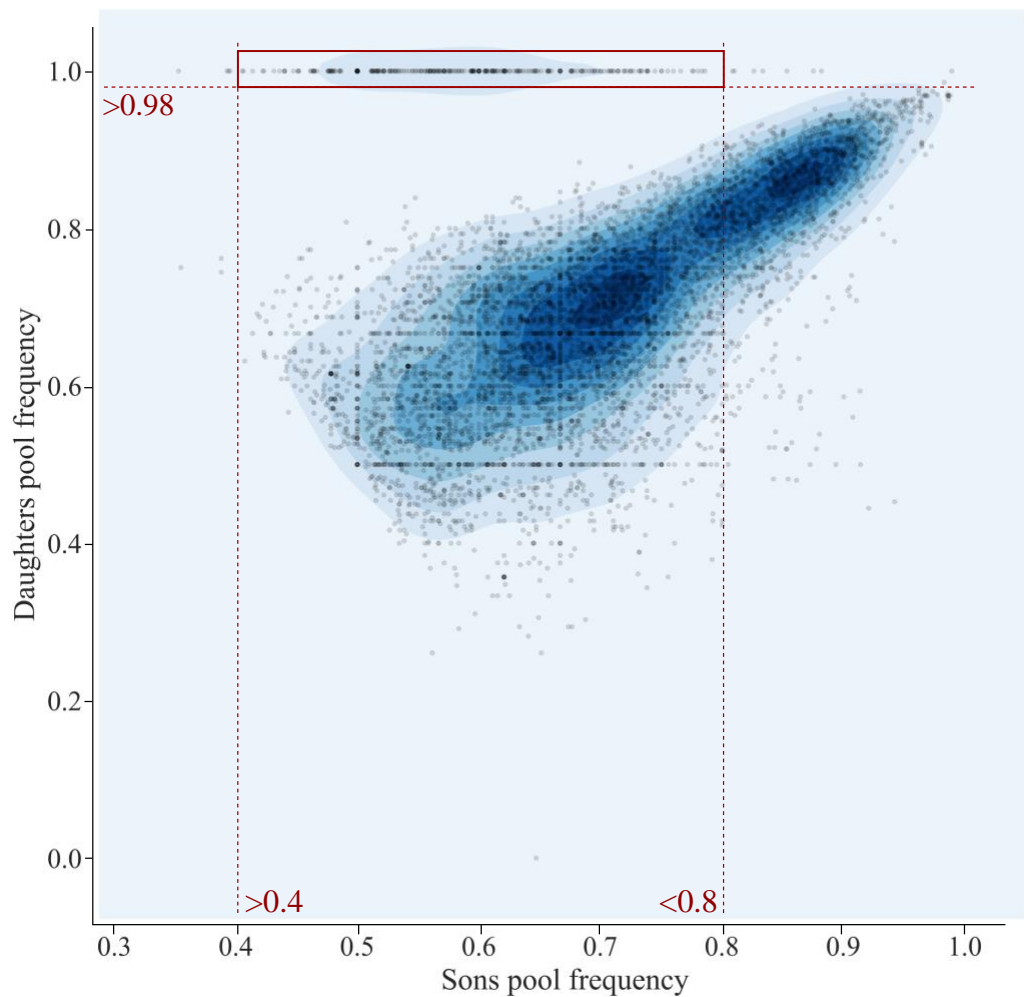

769

770 **Figure S2.** Scatter and density plot comparing the frequency of alleles in the pooled  
771 sequencing of sons and daughters for loci that are heterozygous in the father and homozygous  
772 in the mother. The red box shows the cut-offs used to label points as putatively sex linked in  
773 figures 1 and 2.

774

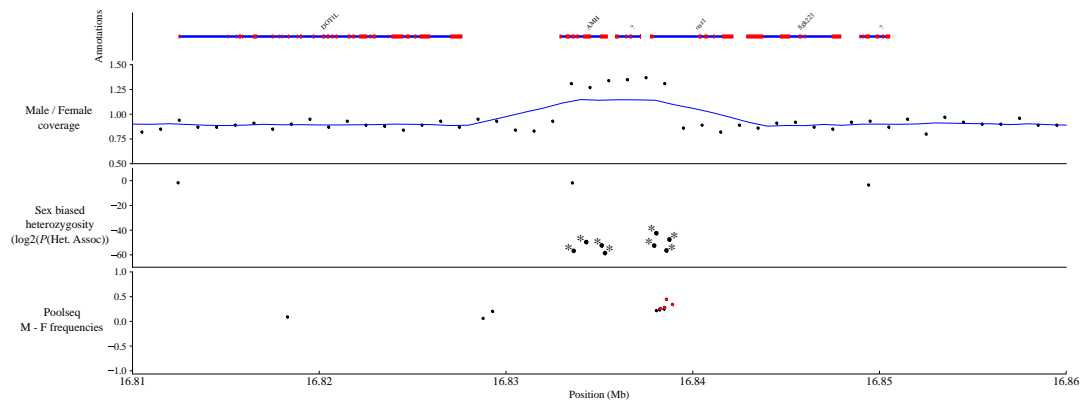

775

776 **Figure S3.** Zoomed in view of sex linkage signal around *Amh08* in *C. inconstans*. An  
777 increase in male to female coverage suggests a male specific copy of *Amh* exists. Blue line  
778 represents the rolling average across 10 1kb windows. Asterisks on the heterozygosity  
779 association panel represent eight completely sex-linked variants.

780

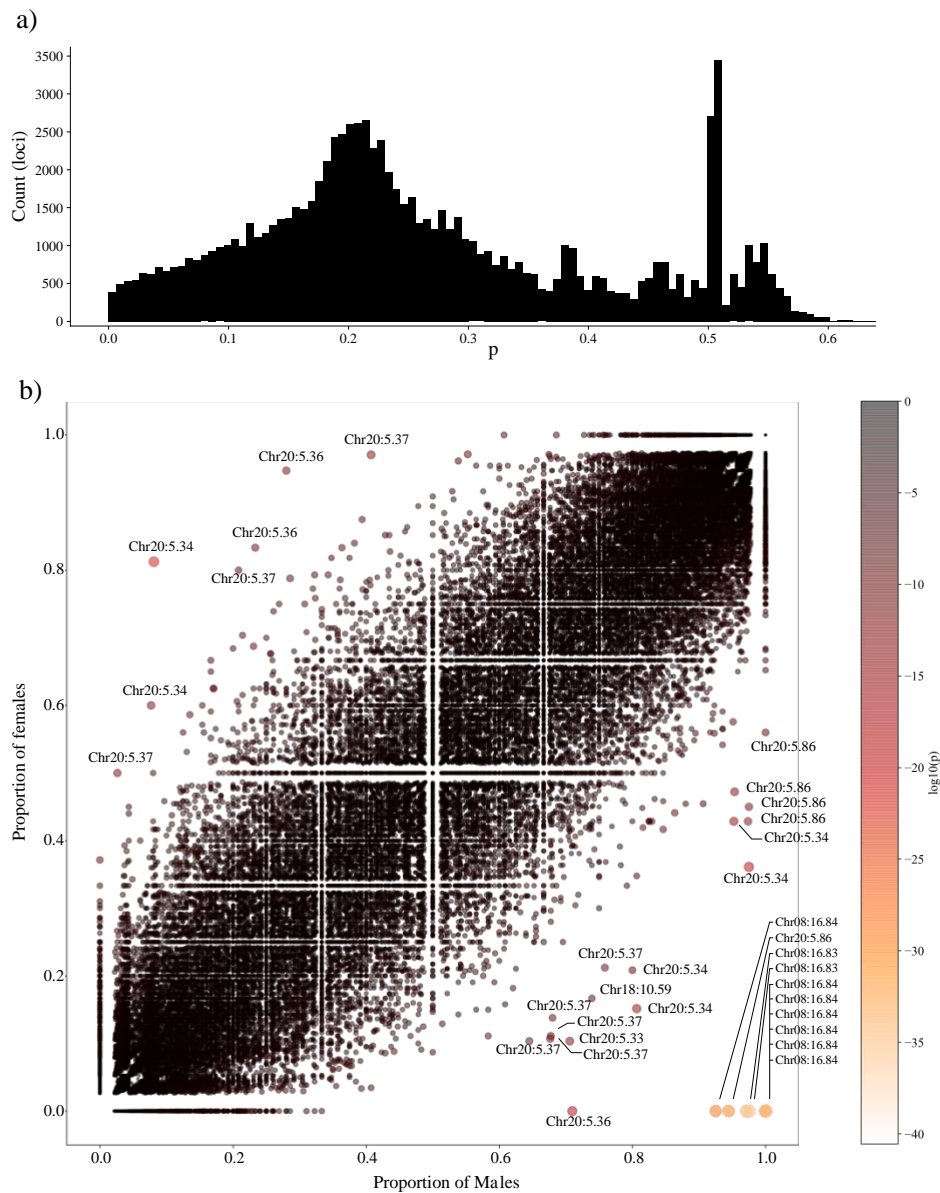

781

782

783

784

**Figure S4.** a) Distribution of  $P$  values for association between sex and heterozygosity in the Shunda lake whole genome resequencing dataset. b) Scatter plot showing proportion of heterozygous males vs proportion of heterozygous females for each SNP. Points are coloured



785 and sized according to the  $P$  value for the association between heterozygosity and sex. A  
786 subset of the most sex-linked loci are labelled to illustrate the enrichment of loci on  
787 Chromosomes 08 and 20.  
788

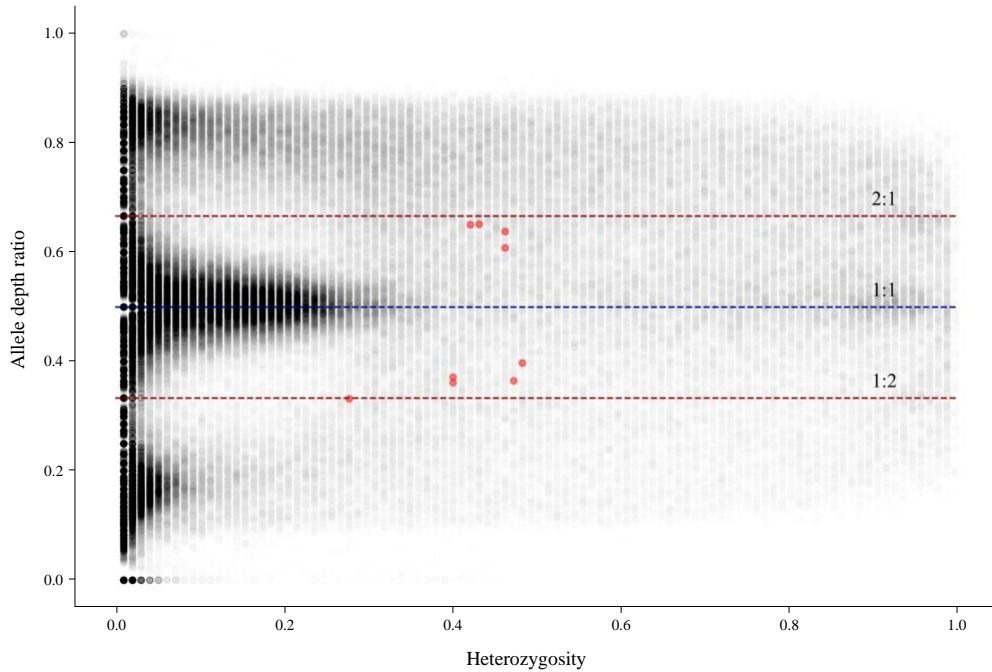

789  
790 **Figure S5.** Comparison of heterozygosity and allelic depth ratio for each variant in the  
791 Shunda Lake whole genome resequencing dataset, as calculated by HDplot. Red dashed lines  
792 represent the allele depth ratio expected for loci with a duplicated sex linked copy. Red points  
793 represent the 10 completely sex-linked markers in the dataset.  
794

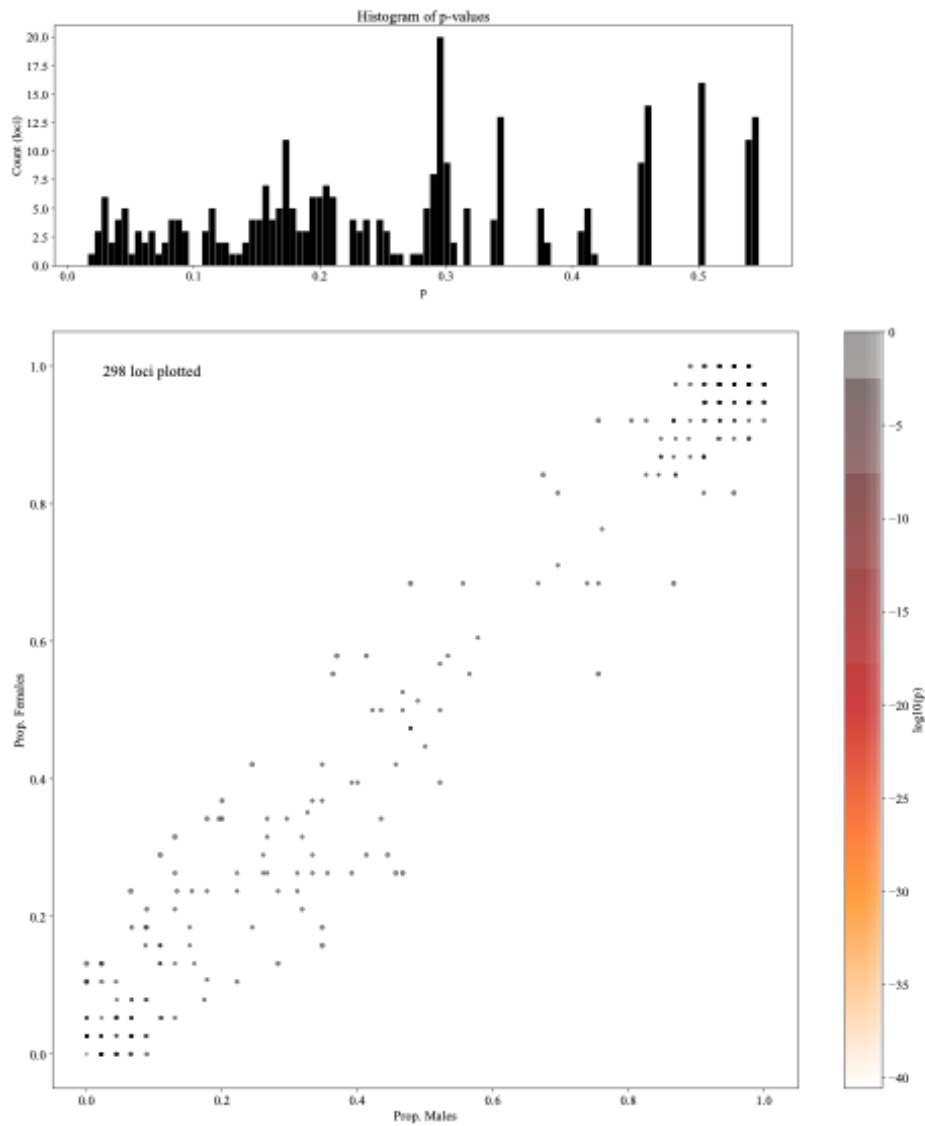

795

796

797

798

**Figure S6.** Test for association between sex and heterozygosity of structural variants called using DELLY. Points in the scatter plot are coloured and sized based on their  $P$  value (scale is identical to Fig. S4b). No variant shows any sign of association of sex linkage.

799

800 **Table S1.** Outputs from the Provean predictions for the impact of amino acid changes among  
801 *Amh* paralogs. Variants are listed in the format: Position, *Amh08* amino acid, *AmhY* amino  
802 acid.

803

| Variant ( <i>Gasterosteus</i> ) |   | PROVEAN score Prediction (cutoff= -2.5) |
|---------------------------------|---|-----------------------------------------|
| 9                               | G | S 0.102 Neutral                         |
| 19                              | P | S 0.692 Neutral                         |
| 22                              | R | Q 0.33 Neutral                          |
| 25                              | T | I -0.197 Neutral                        |
| 52                              | G | A -0.252 Neutral                        |
| 59                              | F | L -0.892 Neutral                        |
| 79                              | N | K -0.554 Neutral                        |
| 83                              | S | T 0.3 Neutral                           |
| 89                              | G | T 1.249 Neutral                         |
| 92                              | D | N -1.399 Neutral                        |
| 95                              | A | S 0.257 Neutral                         |
| 98                              | A | V 0.233 Neutral                         |
| 126                             | S | P -1.033 Neutral                        |
| 127                             | E | N -2.817 Deleterious                    |
| 133                             | A | P -0.794 Neutral                        |
| 135                             | V | M 0.032 Neutral                         |
| 142                             | P | Q -0.185 Neutral                        |
| 151                             | A | V 0.522 Neutral                         |
| 155                             | A | T -0.533 Neutral                        |
| 156                             | L | F 2.927 Neutral                         |
| 158                             | G | S -0.008 Neutral                        |
| 161                             | A | D -0.533 Neutral                        |
| 162                             | G | R -1.788 Neutral                        |
| 169                             | C | F 2.8 Neutral                           |
| 172                             | Q | K -1.042 Neutral                        |
| 188                             | W | C -0.192 Neutral                        |
| 199                             | D | G 1.982 Neutral                         |
| 206                             | R | K -1.146 Neutral                        |
| 211                             | A | T 0.408 Neutral                         |
| 219                             | R | Q 0.594 Neutral                         |
| 223                             | E | R -1.646 Neutral                        |
| 227                             | G | D -2.585 Deleterious                    |
| 232                             | S | T -0.976 Neutral                        |
| 244                             | G | L -2.303 Neutral                        |
| 245                             | K | E 0.624 Neutral                         |
| 247                             | G | V -3.684 Deleterious                    |
| 249                             | D | S -1.428 Neutral                        |

|     |   |                      |
|-----|---|----------------------|
| 258 | P | L -3.625 Deleterious |
| 276 | V | I -0.44 Neutral      |
| 282 | R | H -0.275 Neutral     |
| 283 | E | K -0.634 Neutral     |
| 284 | S | F -2.249 Neutral     |
| 285 | S | T -0.185 Neutral     |
| 288 | Q | K -1.244 Neutral     |
| 293 | K | Q 1.056 Neutral      |
| 297 | P | S -2.817 Deleterious |
| 302 | P | L 1.421 Neutral      |
| 308 | L | M -0.619 Neutral     |
| 320 | V | I 0.04 Neutral       |
| 324 | R | S 1.328 Neutral      |
| 326 | R | W 2.1 Neutral        |
| 329 | G | M -0.144 Neutral     |
| 331 | Q | P -1.137 Neutral     |
| 334 | S | R 0.779 Neutral      |
| 338 | A | S -1.092 Neutral     |
| 339 | F | L 1.997 Neutral      |
| 341 | P | A -3.59 Deleterious  |
| 349 | R | Q 0.56 Neutral       |
| 353 | A | V -1.564 Neutral     |
| 360 | A | T -0.479 Neutral     |
| 369 | R | Q 0.546 Neutral      |
| 370 | G | R 0.983 Neutral      |
| 372 | T | N -2.044 Neutral     |
| 373 | E | D -0.845 Neutral     |
| 384 | L | F -0.226 Neutral     |
| 386 | M | V -0.079 Neutral     |
| 391 | P | A 0.06 Neutral       |
| 393 | G | V -2.063 Neutral     |
| 394 | R | N 1.039 Neutral      |
| 407 | T | M -3.419 Deleterious |
| 409 | A | S -0.667 Neutral     |
| 410 | R | H -0.469 Neutral     |
| 413 | E | A -2.475 Neutral     |
| 414 | A | V -0.727 Neutral     |
| 418 | Q | L 1.038 Neutral      |
| 420 | A | T -0.935 Neutral     |
| 421 | T | N -1.726 Neutral     |
| 435 | G | R 0.153 Neutral      |
| 442 | T | N 1.1 Neutral        |
| 464 | Y | F 0.918 Neutral      |

|     |   |                  |
|-----|---|------------------|
| 468 | D | N 0.138 Neutral  |
| 469 | A | G -0.491 Neutral |
| 477 | N | M -0.065 Neutral |
| 482 | V | D 1.329 Neutral  |
| 483 | D | G 5.81 Neutral   |
| 484 | N | D -1.052 Neutral |
| 485 | G | R 1.032 Neutral  |
| 486 | D | E 0.047 Neutral  |
| 487 | E | D -0.932 Neutral |
| 489 | A | T -1.497 Neutral |
| 508 | H | N -0.386 Neutral |
| 514 | L | I 0.161 Neutral  |
| 524 | E | G 6.256 Neutral  |

| Variant (C. inconstans) | PROVEAN score | Prediction (cutoff= -2.5) |
|-------------------------|---------------|---------------------------|
| 409                     | A             | T -0.663 Neutral          |
| 480                     | V             | M 0.16 Neutral            |
| 501                     | E             | K -0.394 Neutral          |

Gasterosteus: Number of

homologous Amh sequences = 66    number of CD-hit clusters = 30

C. inconstans: Number of

homologous Amh sequences = 68    number of CD-hit clusters = 30
